# Supplementary material for: Inferring Species Richness and Turnover by Statistical Multiresolution Texture Analysis of Satellite Imagery
Source: PLOS journal article supplement (doi:10.1371/journal.pone.0046616), 2012-10-24
Supplement: S9 (10.1371/journal.pone.0046616.s009) [file journal.pone.0046616.s009]

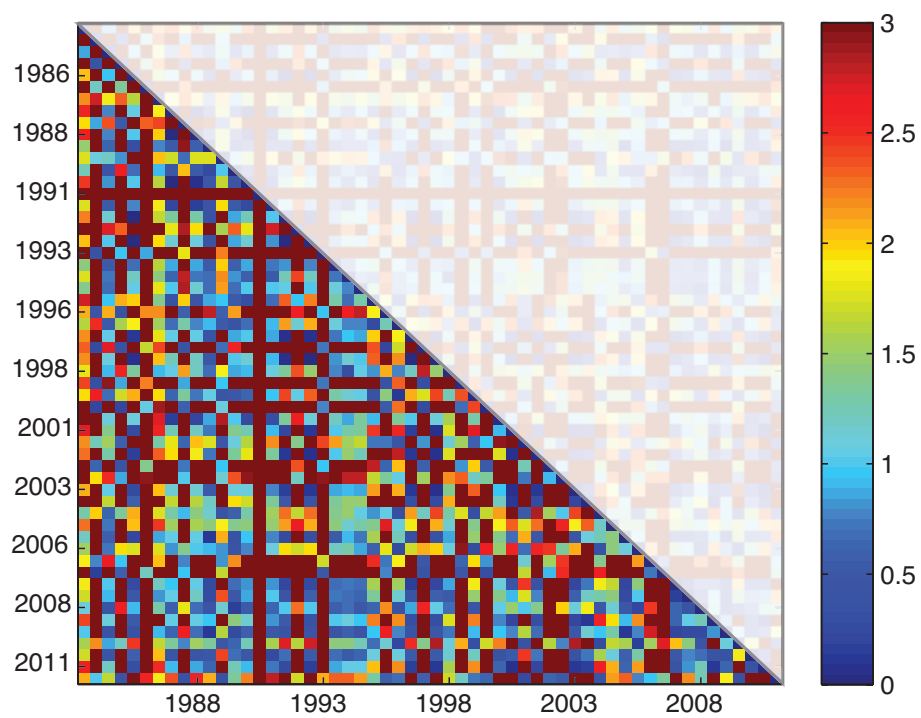

Figure S9:
